# Supplementary material for: Cost-effectiveness of a rule-out algorithm of acute myocardial infarction in low-risk patients: emergency primary care versus hospital setting
Source: PubMed Central journal article supplement (PMC9587629; doi:10.1186/s12913-022-08697-6), 2022-10-21
Supplement: 12913_2022_8697_MOESM1_ESM.pdf [file 12913_2022_8697_MOESM1_ESM.pdf]

Supplementary appendix to the manuscript:

**Cost-effectiveness of a rule-out algorithm of acute myocardial infarction in low-risk patients: Emergency primary care versus hospital setting**

**By**

Tonje R. Johannessen, Sigrun Halvorsen, Dan Atar,  
John Munkhaugen, Anne Kathrine Nore, Torbjørn Wisløff,  
and Odd Martin Vallersnes

Oslo, Norway, 2022

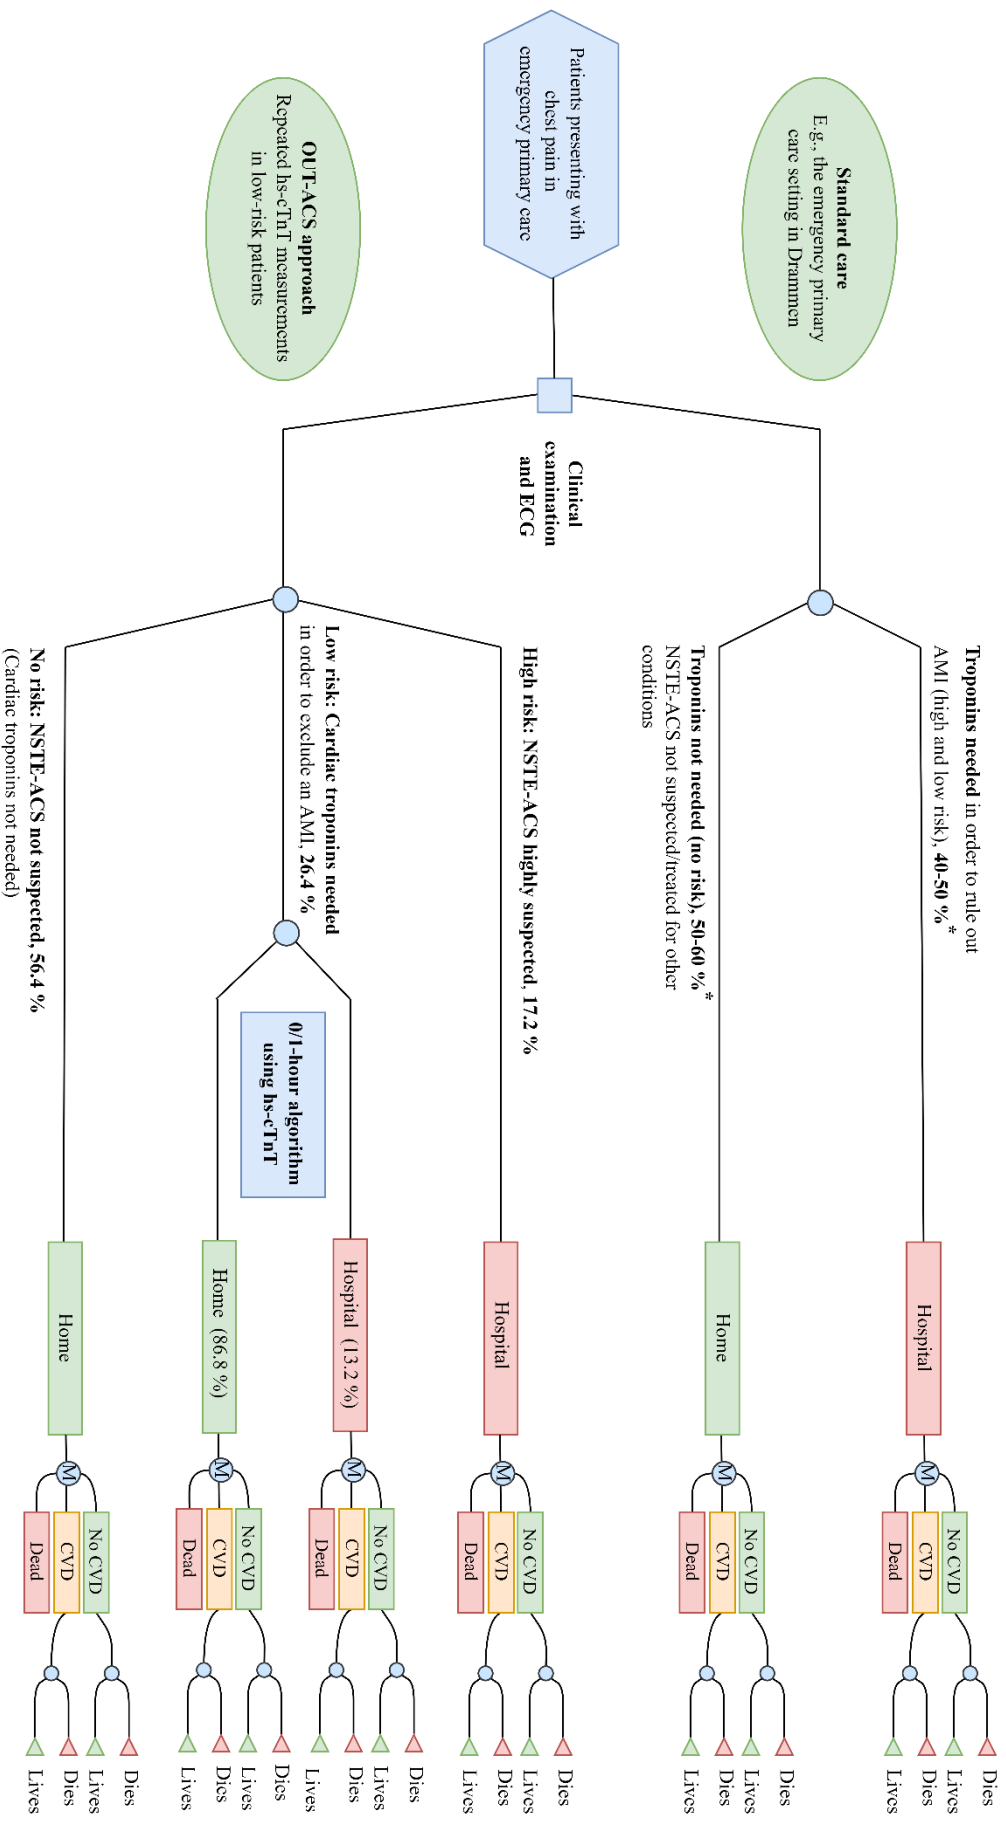

**Figure S1 Decision tree**

Hexagon indicates patient population, blue quadrant indicates decision made by the treating physician, blue circles including “M” indicate where the Markov model starts.  
 \* Ref. Burman RA et al., BMC Fam Pract. 2014; Hoorweg BB et al., Heart, 2017; Vester MPM et al., Eur Heart J Qual Care Clin Outcomes, 2020.

AMI: acute myocardial infarction; ECG: electrocardiogram; hs-cTn: high-sensitivity cardiac troponin; NSTE-ACS: acute coronary syndrome; OAEQC: Oslo Accident and Emergency Outpatient Clinic; OUT-ACS: One-hoUr Troponin in a low-prevalence population of Acute Coronary Syndrome

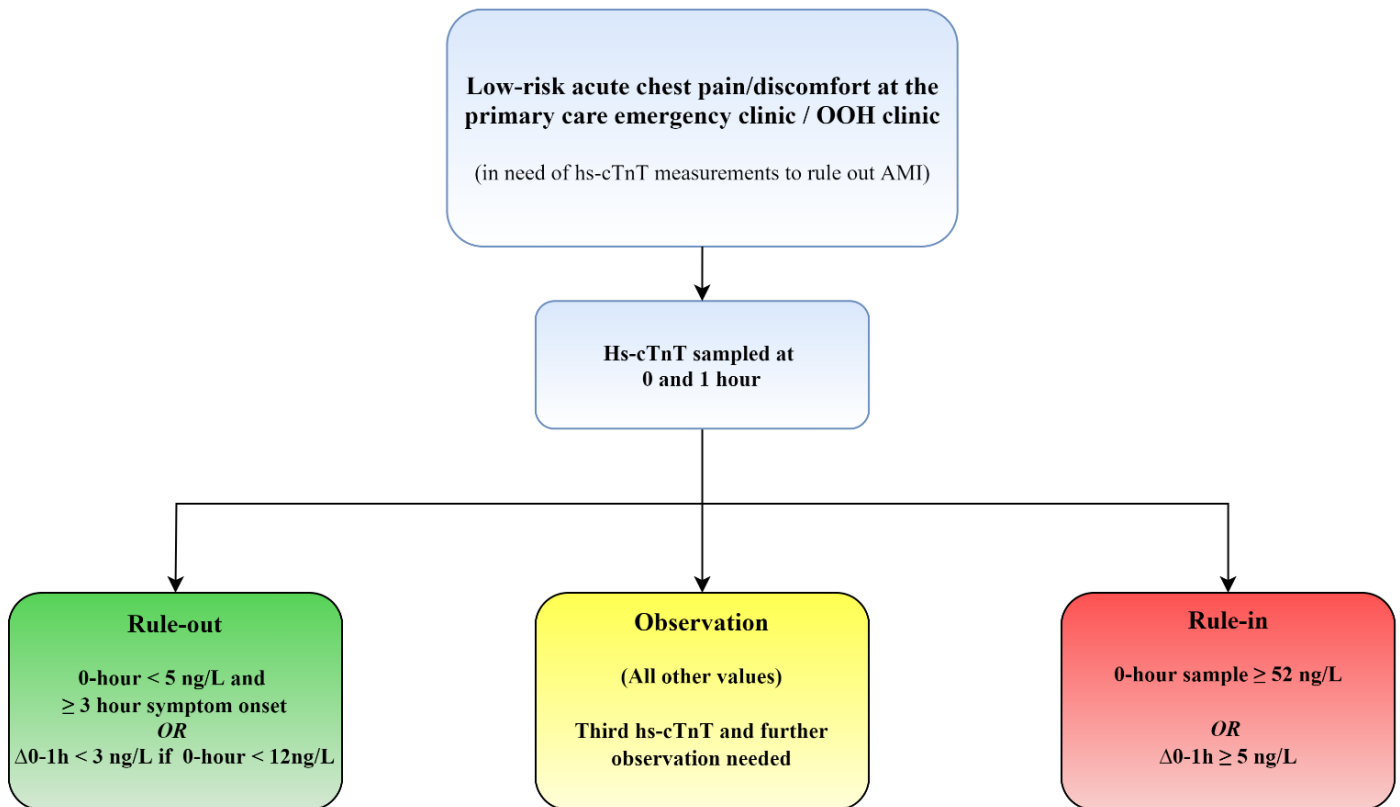

**Figure S2 The ESC 0/1-hour algorithm for hs-cTnT**

The ESC 0/1-hour algorithm for hs-cTnT presented according to the recent 2020 ESC guidelines on NSTEMI-ACS.<sup>(1)</sup> The algorithm uses assay-specific cut-off values and should always be interpreted in conjunction with the clinical assessment and the electrocardiogram.

AMI: acute myocardial infarction; ESC: European Society of Cardiology; hs-cTnT: high-sensitivity cardiac troponin T; ng/L: nanogram per litre; NSTEMI-ACS: non-ST-segment elevation acute coronary syndrome

| <b>Table S1 Estimating health care expenditure</b>                                                                  |                                                                                                                                                                                                                                                                                                                                                                                                                                                                                                                                                                                                                                                                                                                                                                                                                                                                                                                                                                                                   |                                             |
|---------------------------------------------------------------------------------------------------------------------|---------------------------------------------------------------------------------------------------------------------------------------------------------------------------------------------------------------------------------------------------------------------------------------------------------------------------------------------------------------------------------------------------------------------------------------------------------------------------------------------------------------------------------------------------------------------------------------------------------------------------------------------------------------------------------------------------------------------------------------------------------------------------------------------------------------------------------------------------------------------------------------------------------------------------------------------------------------------------------------------------|---------------------------------------------|
| <b>Costs and resources</b>                                                                                          | <b>Estimates and calculations</b>                                                                                                                                                                                                                                                                                                                                                                                                                                                                                                                                                                                                                                                                                                                                                                                                                                                                                                                                                                 | <b>Total costs (EUR)</b>                    |
| <p><b>Ambulance transport</b></p> <p>EUR 559 per transport (2020 figures)</p>                                       | <p><b>Transport to primary care emergency clinic:</b></p> <ul style="list-style-type: none"> <li>• 29 % of the low-risk OUT-ACS cohort</li> </ul> <p><b>Transport from primary care emergency to hospital</b> (recommended for all patients admitted with a suspected NSTEMI-ACS)</p> <ul style="list-style-type: none"> <li>• Probability 0.90 (0.75-1.00)</li> </ul>                                                                                                                                                                                                                                                                                                                                                                                                                                                                                                                                                                                                                            | <p><b>EUR 162</b></p> <p><b>EUR 503</b></p> |
| <p><b>Primary care emergency clinic, Oslo</b> (2017 figures)</p> <p>Standard costs per patient</p>                  | <p><b>Direct costs per patient</b> (Including wages triage, doctors, nurses, staff, service, consultation, diagnostics, treatment) = <u>EUR 119</u></p> <p><b>Other costs per patient</b> (including administration, safety, cleaning services, building) = <u>EUR 37</u></p> <p><u>Total costs per patient: EUR 157</u></p> <p><u>Adjusted to 2020 figures:</u></p>                                                                                                                                                                                                                                                                                                                                                                                                                                                                                                                                                                                                                              | <p><b>EUR 166</b></p>                       |
| <p><b>Additional costs at the primary care emergency clinic</b></p> <p>Personnel resources and costs (2 models)</p> | <p><b>Model 1: Personnel wages</b> (2020 figures)<br/>Additional time spent with the 0/1-hour algorithm x personnel costs per hour:</p> <p><b>Nurses: 20 min (0.3333) x</b></p> <ul style="list-style-type: none"> <li>• Day: 0.238 x NOK 393 per hour = NOK <u>93,534</u></li> <li>• Other: 0.762 x NOK 569 per hour = NOK <u>433,578</u></li> </ul> <p><u>Total: NOK 175.70</u></p> <p><b>GPs: 50 min (0.8333) x</b><br/><u>Registrar (85 %):</u></p> <ul style="list-style-type: none"> <li>• Day: 0.238 x NOK 576 per hour x 0.85 = NOK <u>116,5248</u></li> <li>• Other: 0.762 x NOK 802 per hour x 0.85 = NOK <u>519,4554</u></li> </ul> <p><u>Senior (15 %):</u></p> <ul style="list-style-type: none"> <li>• Day: 0.238 x NOK 685 per hour x 0.15 = NOK <u>24,4545</u></li> <li>• Other: 0.762 x NOK 940 per hour x 0.15 = NOK <u>107,442</u></li> </ul> <p><u>Total: NOK 639.90</u></p> <p><b>Total GPs and nurses x 1.3</b> (to cover additional social costs) = <u>NOK 1060.28</u></p> | <p><b>Model 1: EUR 99</b></p>               |

|                                                                                                                                                                                                                                                                                                                                                      |                                                                                                                                                                                                                                                                                                                                                                                                                                                                                                                                                                                                                                                                                                                                                                                                                 |                                                                                     |
|------------------------------------------------------------------------------------------------------------------------------------------------------------------------------------------------------------------------------------------------------------------------------------------------------------------------------------------------------|-----------------------------------------------------------------------------------------------------------------------------------------------------------------------------------------------------------------------------------------------------------------------------------------------------------------------------------------------------------------------------------------------------------------------------------------------------------------------------------------------------------------------------------------------------------------------------------------------------------------------------------------------------------------------------------------------------------------------------------------------------------------------------------------------------------------|-------------------------------------------------------------------------------------|
| <p><b>Additional diagnostics with the 0/1-hour algorithm</b><br/>(2020 figures)</p> <p><b>Additional referrals to supplementary cardiac outpatient testing</b><br/>(2019 figures)</p>                                                                                                                                                                | <p><b>Model 2: Helfo tariffs</b> (2020 figures)</p> <ul style="list-style-type: none"> <li>• <math>4 \times 2cd = 4 \times 211 \times 0.238 = 200,872</math></li> <li>• <math>4 \times 2cdd = 4 \times 10 \times 0.238 \times 0.15 = 1,428</math></li> <li>• <math>4 \times 2ck = 4 \times 174 \times 0.762 = 530,352</math></li> </ul> <p><b>Total tariffs x 2</b> (to cover other financing sources):<br/>NOK 732,65 x 2 = <u>NOK 1465,304</u></p> <p><b>Details listed in Table S2</b></p> <ul style="list-style-type: none"> <li>• 4.5 % of the non-hospitalised OUT-ACS group</li> <li>• Assumption: similar referral rate by the regular GP after OAEOC discharge</li> </ul> <p>= Estimated probability 0.10 * CCTA costs NOK 5490</p> <p><u>Adjusted to 2020 figures = NOK 5559 * 0.10 = NOK 556</u></p> | <p><b>Model 2:</b><br/><b>EUR 137</b></p> <p><b>EUR 41</b></p> <p><b>EUR 52</b></p> |
| <p><b>DRG at Drammen hospital</b></p> <p>1 DRG = EUR 4269<br/>(2020 figures)</p> <p>N = 567 patients</p>                                                                                                                                                                                                                                             | <p><b>DRG weight x costs per 1 DRG x patients (n):</b></p> <ul style="list-style-type: none"> <li>• <b>DRG 112A:</b> <math>1.487 \times 4269 \times 1 = 6348.003</math></li> <li>• <b>DRG 143:</b> <math>0.407 \times 4269 \times 425 = 738430.275</math></li> <li>• <b>DRG 980E:</b> <math>0.159 \times 4269 \times 138 = 93670.398</math></li> <li>• <b>DRG 981X:</b> <math>0.173 \times 4269 \times 3 = 2215.611</math></li> </ul> <p>= <b>EUR 840 664.287 / 567 patients</b></p>                                                                                                                                                                                                                                                                                                                            | <p><b>EUR 1483</b></p>                                                              |
| <p>CCTA: coronary computed tomography angiography; DRG: Diagnosis Related Groups; EUR: Euro; GP: general practitioner; NOK: Norwegian Kroner; NSTEMI-ACS: non-ST-segment elevation acute coronary syndrome; OAEOC: Oslo Accident and Emergency Outpatient Clinic; OUT-ACS: One-hour Troponin in a low-risk population of Acute Coronary Syndrome</p> |                                                                                                                                                                                                                                                                                                                                                                                                                                                                                                                                                                                                                                                                                                                                                                                                                 |                                                                                     |

**Table S2 Additional diagnostic tests at the emergency primary care clinic in Oslo if using the ESC 0/1-hour algorithm**

|                                                         | N        | Probability | Price (NOK)<br>2020 figures | Tariff codes | Unit cost (NOK)*               |
|---------------------------------------------------------|----------|-------------|-----------------------------|--------------|--------------------------------|
| <b>Venous blood samples at the clinic</b>               |          |             |                             |              |                                |
| <i>Standard blood panel with the 0/1-hour algorithm</i> |          |             |                             |              |                                |
| P-hs-cTnT x2                                            | 171/171  | 1.00        | 33.65 x 2                   | MB7          | 134.60                         |
| P-CRP                                                   | 171/171  | 1.00        | 9.13                        | MB3          | 18.26                          |
| P-Creatinine                                            | 171/171  | 1.00        | 4.94                        | MB1          | 9.88                           |
| Pt-estimated GFR                                        | 171/171  | 1.00        | 0.48                        | MB0          | 0.96                           |
| S-Potassium                                             | 171/171  | 1.00        | 4.94                        | MB1          | 9.88                           |
| B-Haemoglobin                                           | 171/171  | 1.00        | 9.13                        | MB3          | 18.26                          |
| S-Glucose                                               | 171/171  | 1.00        | 4.94                        | MB1          | 9.88                           |
| <i>Additional venous blood samples</i>                  |          |             |                             |              |                                |
| Abdomen panel*                                          | 24/171   | 0.13        | 4.94 x 6                    | MB1          | 7.71                           |
| B-leukocytes                                            | 70/171   | 0.41        | 9.13                        | MB3          | 7.49                           |
| B-complete blood count                                  | 34/171   | 0.21        | 33.65                       | MB7          | 14.13                          |
| P-D-dimer                                               | 29/171   | 0.18        | 78.95                       | MB9          | 28.42                          |
| P-NT-proBNP                                             | 11/171   | 0.06        | 128.28                      | MB10         | 15.39                          |
| S-Sodium                                                | 65/171   | 0.37        | 4.94                        | MB1          | 3.66                           |
| Third hs-cTnT                                           | 334/1711 | 0.20        | 33.65                       | MB7          | 13.46                          |
| <b>Additional diagnostics</b>                           |          |             |                             |              |                                |
| <i>Additional ECG</i>                                   | 335/1711 | 0.20        | 95 + 120                    | 10b + 707    | 86.00                          |
| <i>Chest x-ray</i>                                      | 15/171   | 0.09        | 71 + 250                    | 851 + 899    | 57.78                          |
| <b>Total costs per low-risk patient</b>                 |          |             |                             |              | <b>NOK 435.76<br/>= EUR 41</b> |

Data on the probabilities of using a specific test or procedure at the OAEOC clinic was extracted from a random selection of the OUT-ACS cohort (10 %, 171/1711). Unit costs are presented in Norwegian Kroner (NOK), where 2020 Euro (EUR) 1.00 = 10.73 NOK. Outpatient radiological and laboratory services were estimated as the reimbursed sum from HELFO plus the patient's fee, multiplied by two, also to include personnel costs at the radiology and lab units.<sup>(2)</sup> Medical biochemistry (MB) tariffs were provided by The Norwegian Directorate of eHealth.<sup>(3)</sup>

\*Abdomen panel: P-ASAT, P-ALAT, P-GGT, P-ALP, P-bilirubin, P-amylase; each with tariff MB1

CRP: C-reactive protein; ECG: electrocardiogram; ESC: European Society of Cardiology; GFR: glomerular filtration rate; hs-cTnT: high-sensitivity cardiac troponin T; NOK: Norwegian Kroner; NT-proBNP: N-Terminal pro-Brain Natriuretic Peptide

**Table S3 Diagnostic tests and procedures at Drammen Hospital**

| Diagnostics                                                                                                                                                                                                                                                                                                                                                                                                                                                                                                                                                                                                                                          | Probability                                                                                              |
|------------------------------------------------------------------------------------------------------------------------------------------------------------------------------------------------------------------------------------------------------------------------------------------------------------------------------------------------------------------------------------------------------------------------------------------------------------------------------------------------------------------------------------------------------------------------------------------------------------------------------------------------------|----------------------------------------------------------------------------------------------------------|
| <p><b>Venous blood samples at ED admission</b></p> <p><b>Standard blood panel (all patients):</b><br/> <i>Includes: B-Sedimentation rate, P-CRP, B-Haemoglobin, B-EVF, Ery-MCV, Ery-MCH, Red cell distribution, B-Leukocytes, B-Neutrophils, B-Lymphocytes, B-Monocytes, B-Eosinophils, B-Basophils, B-thrombocytes, S-Sodium, S-Potassium, P-Calcium, Pt-Estimated GFR, P-Creatinine, P-Cystatin C, P-ALAT, P-ALP, P-Bilirubin, P-Albumin, P-hs-Troponin I x2, B-Glucose, B-HbA1c, P-Cholesterol, P-LDL-cholesterol, P-HDL-cholesterol, P-Triglycerides, Additional serum tube, Additional citrate tube</i></p> <p>P-D-dimer</p> <p>P-NT-proBNP</p> | <p><b>1.00</b></p> <p><b>0.20</b></p> <p><b>0.30</b></p>                                                 |
| <p><b>Diagnostics at ED admission</b></p> <p>ECG</p> <p>Chest x-ray</p> <p>Arterial blood gas</p>                                                                                                                                                                                                                                                                                                                                                                                                                                                                                                                                                    | <p><b>1.00</b></p> <p><b>1.00</b></p> <p><b>0.07</b></p>                                                 |
| <p><b>Advanced procedures</b></p> <p>Stress ECG</p> <p>Echocardiogram</p> <p>Long-term ECG monitoring</p> <p>Holter ECG monitoring</p> <p>Other procedures</p>                                                                                                                                                                                                                                                                                                                                                                                                                                                                                       | <p>0.23 (129/567)</p> <p>0.09 (52/567)</p> <p>0.01 (7/567)</p> <p>0.003 (2/567)</p> <p>0.03 (17/567)</p> |
| <p><b>Total</b></p>                                                                                                                                                                                                                                                                                                                                                                                                                                                                                                                                                                                                                                  | <p><b>0.32 (181/567)*</b></p>                                                                            |
| <p>The probabilities of diagnostic tests and procedures applied in the hospital assessment were included in the cost-driving estimates of hospital costs (Diagnosis-Related Groups).<br/> * A total of 207 advanced procedures performed in 181 of 567 patients</p> <p>ECG: electrocardiogram; ED: emergency department; NT-proBNP: N-Terminal pro-Brain Natriuretic Peptide</p>                                                                                                                                                                                                                                                                     |                                                                                                          |

**Table S4 Additional length of stay in the low-risk emergency primary care cohort**

|                                                                                                                                                        | <b>Rule-out</b><br><b>n = 1232</b><br><b>83.0 %</b> | <b>Observation</b><br><b>n = 243</b><br><b>16.4 %</b> | <b>Rule-in</b><br><b>n = 10</b><br><b>0.7 %</b> |
|--------------------------------------------------------------------------------------------------------------------------------------------------------|-----------------------------------------------------|-------------------------------------------------------|-------------------------------------------------|
| 0h + 1h sample*                                                                                                                                        | 67.1209<br>(SD 9.3652)                              | 67.1209<br>(SD 9.3652)                                | 67.1209<br>(SD 9.3652)                          |
| Preparation + lab transport                                                                                                                            | 30 (20-40)                                          | 30 (20-40)                                            | 30 (20-40)                                      |
| Central lab                                                                                                                                            | 75 (60-90)                                          | 75 (60-90)                                            | 75 (60-90)                                      |
| Additional tests for patients in the Observation group<br>(third hs-cTnT, repeated ECG, supplementary tests, lab preparation, transport, and analysis) | -                                                   | 120<br>(100-140)                                      | -                                               |
| Discharge by the treating GP                                                                                                                           | 15 (10-20)                                          | 15 (10-20)                                            | 15 (10-20)                                      |
| <b>Total (base case scenario)</b>                                                                                                                      | 187 min<br>(160-220) =<br><b>3.1 hours</b>          | 307 min<br>(260-360) =<br><b>5.1 hours</b>            | 187 min<br>(160-220) =<br><b>3.1 hours</b>      |
| <b>Total (conservative scenario)</b>                                                                                                                   | 217 min =<br><b>3.6 hours</b>                       | 357 min =<br><b>6.0 hours</b>                         | 217 min =<br><b>3.6 hours</b>                   |

Estimated additional length of stay among 1485 non-hospitalised patients in the OUT-ACS cohort. As the ESC 0/1-hour algorithm has not yet been implemented as a clinical routine at the emergency primary care clinic, the estimated additional length of stay is based on best guesses after interviewing senior personnel (GPs and nurses). Brackets illustrate the range of uncertainty in the estimates, where the upper range for each step was chosen in the conservative scenario.

\* Time interval (mean) between 0- and 1-hour hs-cTnT samples in the OUT-ACS study, n=1711 patients<sup>(4)</sup>

ECG: electrocardiogram; GP: general practitioner; hs-cTnT: high-sensitivity cardiac troponin T; min: minutes; OAEOC: Oslo Accident and Emergency Outpatient Clinic; OUT-ACS: One-hoUr Troponin in a low-prevalence population of Acute Coronary Syndrome; SD: standard deviation



## **Additional details concerning the Markov model**

The Markov model was created to add a lifetime health perspective. In the model, patients discharged as healthy were calculated separately from those discharged with ACS. For the healthy group, background mortality from Statistics Norway was used.<sup>(5)</sup> For those with CVD, increased mortality of 1.6 was assumed, as mentioned in the main text. To make adjustments correctly, the rate ratio was multiplied with rates of death and then transformed into a probability using standard methods, as for instance explained by Briggs and colleagues.<sup>(6)</sup>

Weights for health related quality of life among the general population was based on Norwegian national guidelines for health economic evaluation<sup>(2)</sup> and from previous Norwegian models,<sup>(7)</sup> assuming 0.9 as weight for those discharged with CVD. Quality of life weights were added based on the multiplicative principle. As mentioned in the main text of the article, discount rate of 4% were applied and half cycle correction was used to account for events happening on average in the middle of years.

## **Description of probabilistic sensitivity analysis**

We also conducted a probabilistic sensitivity analysis where parameters in our base case model were incorporated as probability distributions. All distributions were incorporated according to common standards, with probabilities as beta or Dirichlet distributions and costs as gamma distributions.<sup>(6)</sup> Weights for health-related quality of life were incorporated as beta distributions due to weights not likely to be below 0 for any included health states.

Results indicate a 100% probability of the intervention being cost-effective given assumptions in the base case, as all iterations of the Monte Carlo simulation lies in the lower right quadrant of the cost-effectiveness plane (Figure S3). In health economic literature, this is often indicated as being a *dominant* strategy. With two possible strategies, all iterations in the lower right quadrant will also lead to the dominant strategy having a 100% probability of being cost-effective regardless of the variation of the cost-effectiveness threshold (Figure S4).

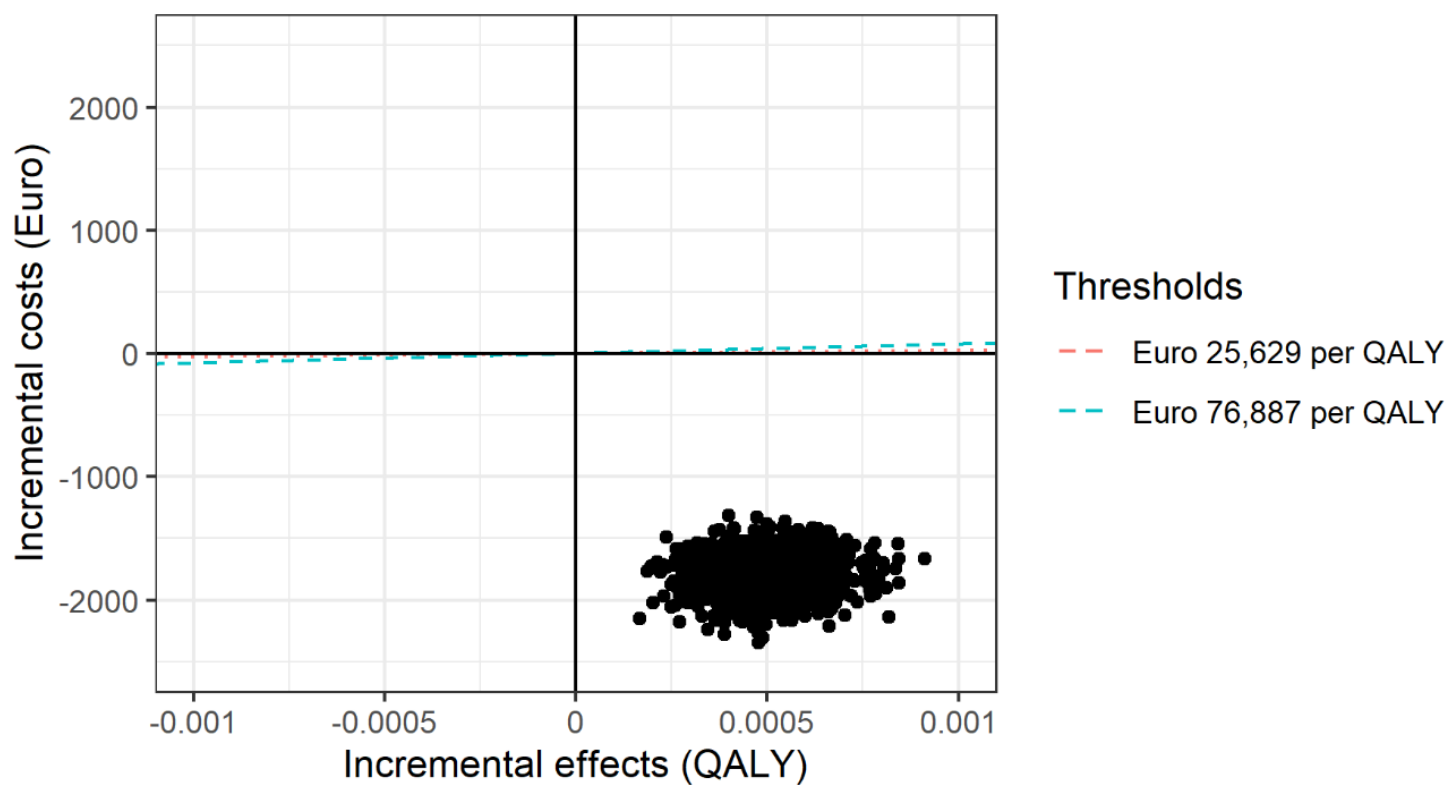

**Figure S3 Scatter plot in a cost-effectiveness plane**

Dots indicate each iteration from Monte Carlo simulations. Dotted lines for suggested Norwegian thresholds for cost-effectiveness.

QALY: quality-adjusted life-years

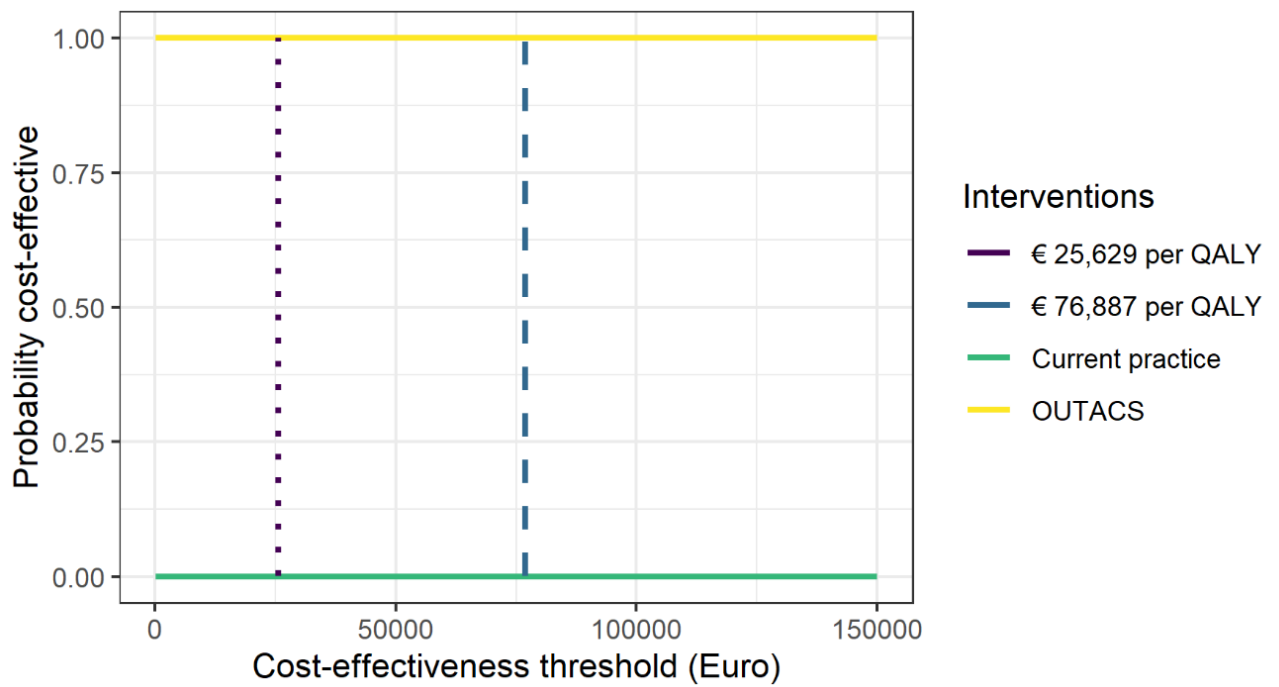

**Figure S4 Cost-effectiveness acceptability curve**

The curve indicates the probability of cost-effectiveness, given assumptions in the base case scenario.

OUT-ACS: One-hoUr Troponin in a low-prevalence population of Acute Coronary Syndrome;  
 QALY: quality-adjusted life-years

**Table S5 Distance from emergency primary care to available hs-cTn assay according to the Norwegian population in 2020**

|    | Norwegian OOH/emergency primary care clinics 2020 <sup>(8)</sup> | Nearest hospital ED with an available hs-cTn assay (24/7) | Kilometres to ED | Minutes to ED (by car) | OOH catchment area <sup>(8)</sup> | Cumulative population |
|----|------------------------------------------------------------------|-----------------------------------------------------------|------------------|------------------------|-----------------------------------|-----------------------|
| 1  | Asker og Bærum OOH                                               | Bærum hospital                                            | 0                | 0                      | 127731                            | 127731                |
| 2  | Dalane (Eigersund) OOH                                           | Stavanger University hospital                             | 0                | 0                      | 24080                             | 151811                |
| 3  | Elverum OOH                                                      | Innlandet hospital, Elverum                               | 0                | 0                      | 36475                             | 188286                |
| 4  | Flekkefjord OOH                                                  | Sørlandet hospital, Flekkefjord                           | 0                | 0                      | 25380                             | 213666                |
| 5  | Frøya OOH                                                        | Orkdal hospital                                           | 0                | 0                      | 5151                              | 218817                |
| 6  | Gjøvik OOH                                                       | Gjøvik hospital                                           | 0                | 0                      | 65593                             | 284410                |
| 7  | Hammerfest OOH                                                   | Hammerfest hospital                                       | 0                | 0                      | 11448                             | 295858                |
| 8  | Kongsberg OOH                                                    | Kongsberg hospital                                        | 0                | 0                      | 51224                             | 347082                |
| 9  | Kongsvinger OOH                                                  | Kongsvinger hospital                                      | 0                | 0                      | 41468                             | 388550                |
| 10 | Kristiansand OOH                                                 | Sørlandet hospital, Kristiansand                          | 0                | 0                      | 130545                            | 519095                |
| 11 | Kristiansund OOH                                                 | Kristiansund hospital                                     | 0                | 0                      | 35621                             | 554716                |
| 12 | Arendal OOH                                                      | Arendal hospital                                          | 0                | 0                      | 101248                            | 655964                |
| 13 | Orkdal region OOH                                                | Orkdal hospital                                           | 0                | 0                      | 42001                             | 697965                |
| 14 | Lillehammer OOH                                                  | Lillehammer hospital                                      | 0                | 0                      | 43943                             | 741908                |
| 15 | Narvik OOH                                                       | University hospital of North Norway, Narvik               | 0                | 0                      | 22936                             | 764844                |
| 16 | Nordfjord OOH                                                    | Nordfjord hospital                                        | 0                | 0                      | 16587                             | 781431                |
| 17 | Rana OOH                                                         | Helgeland hospital, Mo i Rana                             | 0                | 0                      | 30638                             | 812069                |
| 18 | Ringerike OOH                                                    | Ringerike hospital                                        | 0                | 0                      | 65136                             | 877205                |
| 19 | Ryfylke OOH                                                      | Stavanger University hospital                             | 0                | 0                      | 3091                              | 880296                |
| 20 | Skien OOH                                                        | Telemark hospital, Skien                                  | 0                | 0                      | 67857                             | 948153                |
| 21 | Sogn LMS OOH                                                     | Lærdal hospital                                           | 0                | 0                      | 9100                              | 957253                |
| 22 | Stavanger OOH                                                    | Stavanger University hospital                             | 0                | 0                      | 181948                            | 1139201               |
| 23 | Sunnfjord-Ytre Sogn OOH                                          | Førde Central hospital                                    | 0                | 0                      | 33272                             | 1172473               |
| 24 | Sunnhordland OOH                                                 | Stord hospital                                            | 0                | 0                      | 33905                             | 1206378               |
| 25 | Tinn kommunale OOH                                               | Hospitalet Telemark, Skien                                | 0                | 0                      | 5691                              | 1212069               |
| 26 | Tromsø OOH                                                       | University hospital of North Norway, Tromsø               | 0                | 0                      | 76974                             | 1289043               |
| 27 | Trondheim, Malvik, Melhus, Midtre-Gauldal OOH                    | St. Olavs hospital                                        | 0                | 0                      | 242282                            | 1531325               |
| 28 | Ullensvang OOH                                                   | Odda Hospital                                             | 0                | 0                      | 11048                             | 1542373               |
| 29 | Vefsn OOH                                                        | Helgeland hospital, Mosjøen                               | 0                | 0                      | 13278                             | 1555651               |
| 30 | Vesterålen OOH                                                   | Nordland hospital, Vesterålen Stokmarknes                 | 0                | 0                      | 30269                             | 1585920               |
| 31 | Voss OOH                                                         | Voss hospital                                             | 0                | 0                      | 21703                             | 1607623               |

|    | <b>OOH clinics</b><br>(Table continues) | <b>Nearest hospital ED with hs-cTn</b>       | <b>Kilometres to ED</b> | <b>Minutes to ED (car)</b> | <b>OOH catchment area</b> | <b>Cumulative population</b> |
|----|-----------------------------------------|----------------------------------------------|-------------------------|----------------------------|---------------------------|------------------------------|
| 32 | Ålesund OOH                             | Ålesund hospital                             | 0                       | 0                          | 75568                     | 1683191                      |
| 33 | Innhherred OOH                          | Levanger hospital                            | 0.45                    | 2                          | 44555                     | 1727746                      |
| 34 | Harstad OOH                             | University hospital of North Norway, Harstad | 0.55                    | 2                          | 29576                     | 1757322                      |
| 35 | Lofoten OOH                             | Nordland hospital, Lofoten                   | 0.55                    | 3                          | 13720                     | 1771042                      |
| 36 | Drammen OOH                             | Drammen hospital                             | 0.6                     | 2                          | 128197                    | 1899239                      |
| 37 | Hedmarken OOH                           | Innlandet hospital, Elverum                  | 0.65                    | 2                          | 94875                     | 1994114                      |
| 38 | Nord-Østerdal OOH                       | Innlandet hospital, Tynset                   | 0.9                     | 3                          | 12897                     | 2007011                      |
| 39 | Namsos OOH                              | Namsos hospital                              | 1                       | 3                          | 22396                     | 2029407                      |
| 40 | Bodø OOH                                | Nordland hospital, Bodø                      | 1.2                     | 3                          | 53374                     | 2082781                      |
| 41 | Molde OOH                               | Molde hospital                               | 1.3                     | 3                          | 48755                     | 2131536                      |
| 42 | Haugesund OOH                           | Haugesund hospital                           | 1.5                     | 4                          | 55238                     | 2186774                      |
| 43 | Volda, Ørsta OOH                        | Volda hospital                               | 1.9                     | 4                          | 21298                     | 2208072                      |
| 44 | Bergen OOH                              | Haukeland Universtiy hospital                | 1.9                     | 5                          | 283929                    | 2492001                      |
| 45 | Tønsberg OOH                            | Vestfold hospital, Tønsberg                  | 2.3                     | 5                          | 107722                    | 2599723                      |
| 46 | Notodden OOH                            | Notodden hospital                            | 3.3                     | 5                          | 25066                     | 2624789                      |
| 47 | Oslo OOH                                | Ullevål hospital                             | 4                       | 12                         | 693494                    | 3318283                      |
| 48 | Nedre Romerike OOH                      | Akershus University hospital                 | 4.4                     | 7                          | 145973                    | 3464256                      |
| 49 | Sør-Varanger OOH                        | Kirkenes hospital                            | 7.3                     | 8                          | 10158                     | 3474414                      |
| 50 | Sarpsborg, Rakkestad OOH                | Hospitalet i Østfold, Kalnes                 | 7.4                     | 11                         | 64987                     | 3539401                      |
| 51 | Porsgrunn OOH                           | Telemark hospital, Skien                     | 9.8                     | 15                         | 36397                     | 3575798                      |
| 52 | Sandnes OOH                             | Stavanger University hospital                | 13.3                    | 14                         | 91539                     | 3667337                      |
| 53 | Bamble OOH                              | Telemark hospital, Skien                     | 16.4                    | 23                         | 14061                     | 3681398                      |
| 54 | Giske OOH                               | Ålesund hospital                             | 16.7                    | 18                         | 8462                      | 3689860                      |
| 55 | Bråset OOH (Hurum, Røyken)              | Drammen hospital                             | 16.9                    | 23                         | 94441                     | 3784301                      |
| 56 | Nittedal OOH                            | Akershus University hospital                 | 17                      | 24                         | 24249                     | 3808550                      |
| 57 | Vennesla, Iveland OOH                   | Sørlandet hospital, Kristiansand             | 17.1                    | 20                         | 16105                     | 3824655                      |
| 58 | Askøy OOH                               | Haukeland University hospital                | 17.2                    | 20                         | 29553                     | 3854208                      |
| 60 | Sotra OOH                               | Haukeland University hospital                | 17.6                    | 23                         | 38316                     | 3892524                      |
| 59 | Horten OOH                              | Vestfold hospital, Tønsberg                  | 18.5                    | 27                         | 27351                     | 3919875                      |
| 61 | Fredrikstad, Hvaler OOH                 | Hospitalet Østfold, Kalnes                   | 18.7                    | 22                         | 87053                     | 4006928                      |
| 62 | Sykkylven OOH                           | Ålesund hospital                             | 20.4                    | 47                         | 12148                     | 4019076                      |
| 63 | Klepp, Time OOH                         | Stavanger University hospital                | 23.1                    | 24                         | 38504                     | 4057580                      |
| 64 | Karmøy OOH                              | Haugesund hospital                           | 23.3                    | 28                         | 42186                     | 4099766                      |

|    | <b>OOH clinics</b><br>(Table continues) | <b>Nearest hospital ED with hs-cTn</b>       | <b>Kilometres to ED</b> | <b>Minutes to ED (car)</b> | <b>OOH catchment area</b> | <b>Cumulative population</b> |
|----|-----------------------------------------|----------------------------------------------|-------------------------|----------------------------|---------------------------|------------------------------|
| 65 | Gløppen OOH                             | Nordfjord hospital                           | 25.2                    | 51                         | 5854                      | 4105620                      |
| 66 | Helgeland OOH                           | Helgeland hospital, Sandnessjøen             | 25.9                    | 60                         | 9741                      | 4115361                      |
| 67 | Herøy, Dønna OOH                        | Helgeland hospital, Sandnessjøen             | 26.3                    | 63                         | 3148                      | 4118509                      |
| 68 | Moss OOH                                | Østfold hospital, Kalnes                     | 28.7                    | 22                         | 80559                     | 4199068                      |
| 69 | Bjørnafjorden, Samnanger OOH            | Haraldsplass Diakonale hospital              | 29.1                    | 38                         | 27393                     | 4226461                      |
| 70 | Indre Fosen OOH                         | St. Olavs hospital                           | 29.8                    | 66                         | 10084                     | 4236545                      |
| 71 | Sandefjord OOH                          | Tønsberg hospital                            | 29.8                    | 25                         | 63764                     | 4300309                      |
| 72 | Strand OOH                              | Stavanger University hospital                | 30.4                    | 28                         | 12968                     | 4313277                      |
| 73 | Nordhordland OOH                        | Haraldsplass Diakonale hospital              | 30.7                    | 37                         | 45116                     | 4358393                      |
| 74 | Søndre Land OOH                         | Gjøvik hospital                              | 30.8                    | 31                         | 5617                      | 4364010                      |
| 75 | Tysnes OOH                              | Stord hospital                               | 31.7                    | 79                         | 2869                      | 4366879                      |
| 76 | Evenes-Tjeldsund OOH                    | University hospital of North Norway, Harstad | 31.9                    | 34                         | 5564                      | 4372443                      |
| 77 | Ørskog OOH                              | Ålesund hospital                             | 32.5                    | 32                         | 9081                      | 4381524                      |
| 78 | Sogndal OOH                             | Lærdal hospital                              | 33.2                    | 60                         | 11847                     | 4393371                      |
| 79 | Hå OOH                                  | Stavanger University hospital                | 33.6                    | 35                         | 18991                     | 4412362                      |
| 80 | Aremark og Halden OOH                   | Østfold hospital, Kalnes                     | 34                      | 29                         | 32698                     | 4445060                      |
| 81 | Værnesregionen OOH                      | St. Olavs hospital                           | 35                      | 33                         | 31398                     | 4476458                      |
| 82 | Follo OOH                               | Akershus University hospital                 | 36.5                    | 33                         | 126330                    | 4602788                      |
| 83 | Jessheim OOH                            | Akershus University hospital                 | 36.9                    | 28                         | 63508                     | 4666296                      |
| 84 | Austevoll OOH                           | Haukeland University hospital                | 36.9                    | 85                         | 5236                      | 4671532                      |
| 85 | Ulstein-Hareid OOH                      | Ålesund hospital                             | 37.3                    | 73                         | 13746                     | 4685278                      |
| 86 | Kvinnherad OOH                          | Stord hospital                               | 38.3                    | 88                         | 13071                     | 4698349                      |
| 87 | Farsund OOH                             | Sørlandet hospital, Flekkefjord              | 40.7                    | 41                         | 9691                      | 4708040                      |
| 88 | Larvik OOH                              | Vestfold hospital, Tønsberg                  | 40.7                    | 34                         | 47204                     | 4755244                      |
| 89 | Nesna OOH                               | Helgeland hospital, Sandnessjøen             | 42.2                    | 72                         | 1761                      | 4757005                      |
| 90 | Grane, Hattfjelldal OOH                 | Helgeland hospital, Mosjøen                  | 43                      | 40                         | 2779                      | 4759784                      |
| 91 | Nes OOH                                 | Akershus University hospital, Kongsvinger    | 43.1                    | 38                         | 23092                     | 4782876                      |
| 92 | Steinkjer OOH                           | Levanger hospital                            | 43.2                    | 43                         | 26420                     | 4809296                      |
| 93 | Indre Østfold OOH                       | Østfold hospital, Kalnes                     | 43.7                    | 45                         | 52192                     | 4861488                      |
| 94 | Lindesnes OOH                           | Kristiansand hospital                        | 44.3                    | 45                         | 23046                     | 4884534                      |
| 95 | Herøy, Sande OOH                        | Volda hospital                               | 47.4                    | 46                         | 11361                     | 4895895                      |
| 96 | HAS OOH                                 | Kristiansund hospital                        | 48                      | 116                        | 11620                     | 4907515                      |
| 97 | Indre Namdal OOH                        | Namsos hospital                              | 48.4                    | 47                         | 5018                      | 4912533                      |

|            | <b>OOH clinics</b><br>( <i>Table continues</i> ) | <b>Nearest hospital ED with hs-cTn</b>      | <b>Kilometres to ED</b> | <b>Minutes to ED (car)</b> | <b>OOH catchment area</b> | <b>Cumulative population</b> |
|------------|--------------------------------------------------|---------------------------------------------|-------------------------|----------------------------|---------------------------|------------------------------|
| <b>98</b>  | Seljord OOH                                      | Notodden hospital                           | 51.7                    | 50                         | 5291                      | 4917824                      |
| <b>99</b>  | Bremanger OOH                                    | Nordfjord hospital                          | 52.5                    | 75                         | 3629                      | 4921453                      |
| <b>100</b> | Indre Salten OOH                                 | Nordland hospital, Bodø                     | 53.8                    | 55                         | 16336                     | 4937789                      |
| <b>101</b> | Røros-Os-Holtålen OOH                            | Innlandet hospital, Tynset                  | 55.9                    | 53                         | 9453                      | 4947242                      |
| <b>102</b> | Vågan OOH                                        | Nordland hospital, Vesterålen Stokmarknes   | 56.3                    | 90                         | 9608                      | 4956850                      |
| <b>103</b> | Sirdal OOH                                       | Sørlandet hospital                          | 57.3                    | 56                         | 1822                      | 4958672                      |
| <b>104</b> | Kragerø OOH                                      | Skien hospital                              | 58.5                    | 55                         | 10380                     | 4969052                      |
| <b>105</b> | Florø OOH                                        | Førde Central hospital                      | 59.4                    | 56                         | 17207                     | 4986259                      |
| <b>106</b> | Rauma OOH                                        | Molde hospital                              | 59.4                    | 94                         | 7468                      | 4993727                      |
| <b>107</b> | Lunner-Gran OOH                                  | Gjøvik hospital                             | 59.5                    | 50                         | 22678                     | 5016405                      |
| <b>108</b> | Luster OOH                                       | Lærdal hospital                             | 60.2                    | 84                         | 5174                      | 5021579                      |
| <b>109</b> | Eidsvoll OOH                                     | Kongsvinger hospital                        | 62                      | 57                         | 25436                     | 5047015                      |
| <b>110</b> | Karlsøy OOH                                      | University hospital of North Norway, Tromsø | 64.4                    | 65                         | 2200                      | 5049215                      |
| <b>111</b> | Vanylven OOH                                     | Nordfjord hospital                          | 66                      | 62                         | 3117                      | 5052332                      |
| <b>112</b> | Fronsvakta OOH                                   | Lillehammer hospital                        | 68.7                    | 58                         | 8842                      | 5061174                      |
| <b>113</b> | Vega OOH                                         | Helgeland hospital, Sandnessjøen            | 70.4                    | 118                        | 1200                      | 5062374                      |
| <b>114</b> | Trysil OOH                                       | Innlandet hospital, Elverum                 | 71.4                    | 58                         | 6627                      | 5069001                      |
| <b>115</b> | Vik OOH                                          | Voss hospital                               | 73.1                    | 80                         | 2635                      | 5071636                      |
| <b>116</b> | Aurskog-Høland, Rømskog OOH                      | Akershus University hospital, Kongsvinger   | 73.5                    | 65                         | 17390                     | 5089026                      |
| <b>117</b> | Bardu OOH                                        | University hospital of North Norway, Narvik | 74.2                    | 66                         | 16269                     | 5105295                      |
| <b>118</b> | Kvam OOH                                         | Voss hospital                               | 75.5                    | 80                         | 8457                      | 5113752                      |
| <b>119</b> | Lyngen OOH                                       | University hospital of North Norway, Tromsø | 79.2                    | 107                        | 2794                      | 5116546                      |
| <b>120</b> | Vikna, Nærøy OOH                                 | Namsos hospital                             | 87.6                    | 113                        | 9623                      | 5126169                      |
| <b>121</b> | Etne, Vindafjord OOH                             | Stord hospital                              | 89.5                    | 85                         | 12776                     | 5138945                      |
| <b>122</b> | Gildeskål OOH                                    | Nordland hospital, Bodø                     | 90.7                    | 82                         | 1950                      | 5140895                      |
| <b>123</b> | Balsfjord-Storfjord OOH                          | University hospital of North Norway, Tromsø | 92.2                    | 78                         | 7388                      | 5148283                      |
| <b>124</b> | Brønnøy OOH                                      | Helgeland hospital, Sandnessjøen            | 92.4                    | 163                        | 9892                      | 5158175                      |
| <b>125</b> | Nore og Uvdal OOH                                | Kongsberg hospital                          | 93.7                    | 85                         | 2439                      | 5160614                      |
| <b>126</b> | Værøy OOH                                        | Nordland hospital, Lofoten                  | 96.2                    | 175                        | 728                       | 5161342                      |
| <b>127</b> | Valdres OOH                                      | Gjøvik hospital                             | 97.3                    | 88                         | 17578                     | 5178920                      |
| <b>128</b> | Fosen OOH                                        | St. Olavs hospital                          | 101                     | 125                        | 14611                     | 5193531                      |
| <b>129</b> | Oppdal OOH                                       | Innlandet hospital, Tynset                  | 102                     | 86                         | 7001                      | 5200532                      |
| <b>130</b> | Sunnadal OOH                                     | Kristiansund hospital                       | 103                     | 99                         | 7036                      | 5207568                      |

|            | <b>OOH clinics</b><br><i>(Table continues)</i> | <b>Nearest hospital ED with hs-cTn</b>      | <b>Kilometres to ED</b> | <b>Minutes to ED (car)</b> | <b>OOH catchment area</b> | <b>Cumulative population</b> |
|------------|------------------------------------------------|---------------------------------------------|-------------------------|----------------------------|---------------------------|------------------------------|
| <b>131</b> | Nord-Gudbrandsdal OOH                          | Lillehammer hospital                        | 109                     | 90                         | 18262                     | 5225830                      |
| <b>132</b> | Sauda OOH                                      | Haugesund hospital                          | 112                     | 116                        | 4595                      | 5230425                      |
| <b>133</b> | Suldal OOH                                     | Haugesund hospital                          | 114                     | 116                        | 3804                      | 5234229                      |
| <b>134</b> | Gol-Hemsedal OOH                               | Ringerike hospital                          | 116                     | 98                         | 7094                      | 5241323                      |
| <b>135</b> | Meløy OOH                                      | Nordland hospital, Bodø                     | 117                     | 103                        | 6288                      | 5247611                      |
| <b>136</b> | Engerdal OOH, Trysil                           | Innlandet hospital, Tynset                  | 119                     | 98                         | 1268                      | 5248879                      |
| <b>137</b> | Vevelstad OOH                                  | Helgeland hospital, Mosjøen                 | 119                     | 153                        | 462                       | 5249341                      |
| <b>138</b> | Lurøy OOH                                      | Helgeland hospital, Sandnessjøen            | 122                     | 183                        | 1890                      | 5251231                      |
| <b>139</b> | Bindal OOH                                     | Hospitalet Namsos                           | 127                     | 56                         | 1426                      | 5252657                      |
| <b>140</b> | Tokke-Vinje OOH                                | Telemark hospital, Skien                    | 128                     | 124                        | 5877                      | 5258534                      |
| <b>141</b> | Solund OOH                                     | Førde Central hospital                      | 129                     | 200                        | 802                       | 5259336                      |
| <b>142</b> | Stor-Elvdal OOH                                | Lillehammer hospital                        | 138                     | 128                        | 2419                      | 5261755                      |
| <b>143</b> | Rødøy OOH                                      | Helgeland hospital, Mo i Rana               | 140                     | 181                        | 1213                      | 5262968                      |
| <b>144</b> | Tana-Nesseby OOH                               | Kirkenes hospital                           | 140                     | 118                        | 3844                      | 5266812                      |
| <b>145</b> | Øvre Hallingdal OOH                            | Ringerike hospital                          | 140                     | 119                        | 7947                      | 5274759                      |
| <b>146</b> | Alta OOH                                       | Hammerfest hospital                         | 142                     | 134                        | 20789                     | 5295548                      |
| <b>147</b> | Porsanger OOH                                  | Hammerfest hospital                         | 143                     | 129                        | 3998                      | 5299546                      |
| <b>148</b> | Træna OOH                                      | Helgeland hospital, Mo i Rana               | 143                     | 319                        | 435                       | 5299981                      |
| <b>149</b> | Leka OOH                                       | Namsos hospital                             | 151                     | 166                        | 557                       | 5300538                      |
| <b>150</b> | Finnsnes OOH                                   | University hospital of North Norway, Tromsø | 159                     | 133                        | 18315                     | 5318853                      |
| <b>151</b> | Hol OOH                                        | Ringerike hospital                          | 159                     | 135                        | 4441                      | 5323294                      |
| <b>152</b> | Måsøy OOH                                      | Hammerfest hospital                         | 168                     | 153                        | 1225                      | 5324519                      |
| <b>153</b> | Vadsø OOH                                      | Kirkenes hospital                           | 171                     | 144                        | 5788                      | 5330307                      |
| <b>154</b> | Kåfjord OOH                                    | University hospital of North Norway, Tromsø | 179                     | 150                        | 2071                      | 5332378                      |
| <b>155</b> | Nordkapp OOH                                   | Hammerfest hospital                         | 181                     | 167                        | 3162                      | 5335540                      |
| <b>156</b> | Bykle-Valle OOH, Hovden                        | Telemark hospital, Skien                    | 194                     | 184                        | 2129                      | 5337669                      |
| <b>157</b> | Steigen OOH                                    | Bodø hospital                               | 212                     | 183                        | 5374                      | 5343043                      |
| <b>158</b> | Karasjok OOH                                   | Hammerfest hospital                         | 218                     | 186                        | 2628                      | 5345671                      |
| <b>159</b> | Nordreisa OOH                                  | University hospital of North Norway, Tromsø | 224                     | 199                        | 4861                      | 5350532                      |
| <b>160</b> | Kvænangen OOH                                  | Hammerfest hospital                         | 229                     | 226                        | 1191                      | 5351723                      |
| <b>161</b> | Båtsfjord OOH                                  | Kirkenes hospital                           | 244                     | 193                        | 2221                      | 5353944                      |
| <b>162</b> | Skjervøy OOH                                   | University hospital of North Norway, Tromsø | 245                     | 217                        | 2927                      | 5356871                      |
| <b>163</b> | Vardø OOH                                      | Kirkenes hospital                           | 245                     | 206                        | 2029                      | 5358900                      |
| <b>164</b> | Kautokeino OOH                                 | Hammerfest hospital                         | 271                     | 239                        | 2910                      | 5361810                      |
| <b>165</b> | Berlevåg OOH                                   | Kirkenes hospital                           | 272                     | 216                        | 957                       | 5362767                      |
| <b>166</b> | Hasvik OOH                                     | Hammerfest hospital                         | 278                     | 318                        | 1005                      | 5363772                      |



|            | <b>OOH clinics</b><br>(Table continues) | <b>Nearest hospital ED with hs-cTn</b>      | <b>Kilometres to ED</b> | <b>Minutes to ED (car)</b> | <b>OOH catchment area</b> | <b>Cumulative population</b> |
|------------|-----------------------------------------|---------------------------------------------|-------------------------|----------------------------|---------------------------|------------------------------|
| <b>167</b> | Nordkyn OOH                             | Kirkenes hospital                           | 336                     | 293                        | 2422                      | 5366194                      |
| <b>168</b> | Øksfjord OOH                            | University hospital of North Norway, Tromsø | 355                     | 320                        | 888                       | 5367082                      |
| <b>169</b> | Røst OOH                                | Nordland hospital, Bodø                     | ?                       | ?                          | 498                       | 5367580                      |

The list of Norwegian OOH clinics in 2020 and catchment areas was obtained from the Norwegian Research Centre (NORCE).<sup>(8)</sup>

Distance and minutes by car to nearest hospital ED with available hs-cTn assay was investigated for the purpose of this study by contacting each hospital by phone and Google Maps.

ED: emergency department; hs-cTn: high-sensitivity cardiac troponin; OOH: out-of-hours

## References

1. Collet JP, Thiele H, Barbato E, Barthelémy O, Bauersachs J, Bhatt DL, et al. 2020 ESC Guidelines for the management of acute coronary syndromes in patients presenting without persistent ST-segment elevation. *Eur Heart J*. 2021;42(14):1289-367.
2. The Norwegian Medicines Agency. Guidelines for the submission of documentation for single technology assessment (STA) of pharmaceuticals [Statens legemiddelverk]. 2020 [cited 2021 June 03]. Available from: <https://legemiddelverket.no/english/public-funding-and-pricing/documentation-for-sta/guidelines-for-the-submission-of-documentation-for-single-technology-assessment-sta-of-pharmaceuticals>.
3. The Norwegian Directorate of eHealth. [Norsk laboratoriekodeverk] [Lab koder]. Norwegian Ministry of Health and Care Services; 2020 [cited 2021 September 10]. Available from: <https://www.ehelse.no/kodeverk/laboratoriekodeverk>.
4. Johannessen TR, Vallersnes OM, Halvorsen S, Larstorp ACK, Mdala I, Atar D. Pre-hospital One-Hour Troponin in a Low-Prevalence Population of Acute Coronary Syndrome: OUT-ACS study. *Open Heart*. 2020;7(2).
5. Norway S. Table 07902: Life tables, by sex and age 1966 - 2021 [Internet] 2022 [cited 2022 13 August]. Available from: <https://www.ssb.no/en/statbank/table/07902/>.
6. Briggs A, Claxton K, Sculpher M. *Decision Modelling for Health Economic Evaluation*. 1 ed: Oxford University Press; 2006.
7. Wisløff T, Hagen G, Klemp M. Economic evaluation of warfarin, dabigatran, rivaroxaban, and apixaban for stroke prevention in atrial fibrillation. *Pharmacoeconomics*. 2014;32(6):601-12.
8. Allertsen M, Morken T. 2021, Organisation of Emergency Primary Health Care in Norway 2020, Norwegian Research Centre (NORCE), <https://norceresearch.brage.unit.no/norceresearch-xmlui/bitstream/handle/11250/2755945/Offisiell%20oversikt%20legevakter%20og%20legevaktssentraler%20i%20Norge%202020.xlsx?sequence=6&isAllowed=y>.
